# Supplementary material for: An exploratory pilot study of the effect of modified hygiene kits on handwashing with soap among internally displaced persons in Ethiopia
Source: PubMed Central journal article supplement (PMC8097963; doi:10.1186/s13031-021-00368-3), 2021-05-04
Supplement: 13031_2021_368_MOESM2_ESM.pdf [file 13031_2021_368_MOESM2_ESM.pdf]

## SURVEY FORM

Date: \_\_\_\_/\_\_\_\_/\_\_\_\_ Research Assistant ID: \_\_\_\_ Kebele name: \_\_\_\_\_

### 1. General (ASK QUESTION G1, G2 and G3 before you start observation)

1.1 Household ID: \_\_\_\_

1.2 How many people live in the HH? (People who sleep and eat here every day. No visitors)

.....

1.3 How many children under 5 years old are in the family?

.....

1.4 What level of education have you completed?

- Primary School       Secondary school       Higher education       No education
- No answer

1.5 How much income (money) does your family generate per week on average?

..... birr

1.6 Do you own any animals?

- Goat, how many? .....
- Cow, how many? .....
- Sheep, how many? .....
- Donkey, how many? .....
- Chicken, how many? .....
- Camel, how many? .....
- No animals

### 2 LIFE IN MOYALE

2.1 How long have you lived in this location

..... Months    or ..... years

2.2 If the household are IDPs, what was the reason for displacement?

- Drought       Job opportunity
- Conflict       Illness
- Other: \_\_\_\_\_

2.3 What is your religion?

.....

2.4 Have you attended any events run by humanitarian organisations in the last 3 months where they talked about hygiene?

Yes  No

### 3 Water

3.1 How much water do you collect for the whole family per day?

- 20 litres
- 40 litres
- 60 litres
- 80 litres
- 100 litres
- 120 litres
- 140 litres
- More than 140 litres

3.2 Is the water enough for your family?

Yes  No

3.3 What is your main water source?

- Public tap, standpipe
- Tube well or borehole
- Protected well (covered)
- Unprotected well
- Rainwater (covered cistern/tank)
- Rainwater (uncovered cistern/tank)
- Water truck
- Cart with small tank
- Surface water (river, dam, lake, pond, stream, canal, irrigation channel)
- Bottled or sachet water
- Other: .....

3.4 How many minutes does it take for you to go fetch water at this source and come back? Include queuing in the total time.

..... minutes and ..... Hours

## 4 Sanitation/waste

### 4.1 Where do you defecate?

- Pit latrine with concrete slab (not pour flush)
- Pit latrine without slab (not pour flush)
- Bucket
- Bag
- Open defecation (no facilities)
- Other: .....

### 4.2 How many people in total use your latrine?

.....

## 5 Hygiene

### 5.1 Do you have enough soap for all members of the family?

- Yes                       No

### 5.2 Is soap affordable for you?

- Yes                       No

### 5.3 Can you list some of the advantages of handwashing with soap?

.....

## 6 Spot checks

### 6.1 Check if the following items were available (ask to see them)

- Liquid Soap                       Green (nice) bar soap                       Mirror above handwashing stand
- Bar soap                       Laundry soap                       Handwashing facility

### 6.2 Where was the soap kept (e.g. inside house, at handwashing facility or in kitchen ++)

.....

Only answer 6.3 and 6.4 if there is a handwashing facility present

### 6.3 Was there water in the handwashing facility? (Say yes if there was water in facility during observation)

- Yes                       No

### 6.4 Did the household build a handwashing stand for the facility?

- Yes                       No
