# Supplementary material for: An exploratory pilot study of the effect of modified hygiene kits on handwashing with soap among internally displaced persons in Ethiopia
Source: Confl Health. 2021 May 4;15:35. doi: 10.1186/s13031-021-00368-3 (PMC8097963; doi:10.1186/s13031-021-00368-3)
Supplement: Supplementary file 1 — Additional file 1. Structured Observation Data Collection form. [file 13031_2021_368_MOESM1_ESM.pdf]

## Structured Observation Form

Date: \_\_\_\_/\_\_\_\_/\_\_\_\_ Start time: \_\_\_\_:\_\_\_\_ End time \_\_\_\_:\_\_\_\_ Kebele name: \_\_\_\_\_ Household ID: \_\_\_\_\_ Research Assistant ID: \_\_\_\_\_

[illegible]
